## Volume 1 Fall Issue

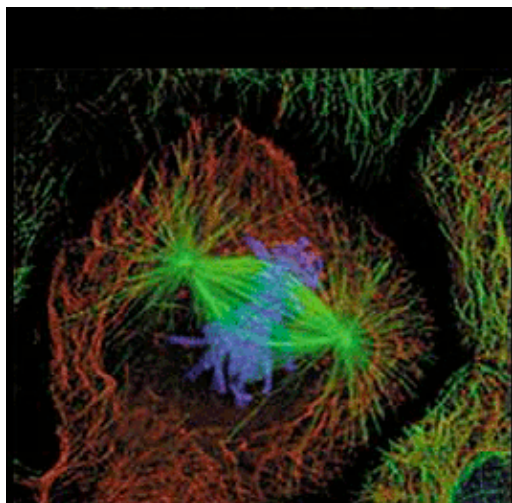

### Table of Contents

Use Arrows to Browse  
Previous Issues

### Contact CBE

8120 Woodmont Avenue Suite  
750  
Bethesda, Maryland 20814-  
2762

Phone: (301) 347-9300  
Fax: (301) 347-9350  
[cbe@ascb.org](mailto:cbe@ascb.org)

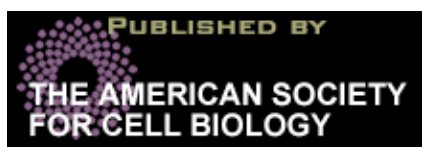

[Editorial Board Member Login](#)

## FEATURES

- **Approaches to Cell Biology Teaching: Questions about Questions**  
by Deborah Allen and Kimberly Tanner
- **WWW.Cell Biology Education**  
by Robert Blystone
- **Meeting Report: Genomics in the Undergraduate Curriculum--Rocket Science or Basic Science?**  
by A. Malcolm Campbell
- **Book Review: Tried, Revised, and Tried Again--A Seasoned Textbook for Undergraduates**  
by Christopher Watters
- **Book Review: Guidebook to Modern Microscopy**  
by J. Richard McIntosh

## ARTICLES

- **Glucose Transport in Cultured Animal Cells: An Exercise for the Undergraduate Cell Biology Laboratory**  
by Mary Lee S. Ledbetter and Malcolm J. Lippert
- **But Are They Learning? Getting Started in Classroom Evaluation**  
by Melissa H. Dancy and Robert J. Beichner

Supported in part by an Undergraduate Science Education Program grant from the Howard Hughes Medical Institute

## ANNOUNCEMENTS

September 3–7, 2005, Sydney, Australia  
**15th International Society of Developmental Biologists Congress**

**Submit Your Manuscript**  
Online Manuscript Submission

- **Instructions to Authors**
- **Top Ten Reasons to Publish in CBE** [pdf]

### Other Information:

There are **6,450** registered users signed up to receive quarterly notification of new content.

[Become a registered user.](#)

**Order a Free CBE Poster**

### On the Cover [[Printable Cover](#)]

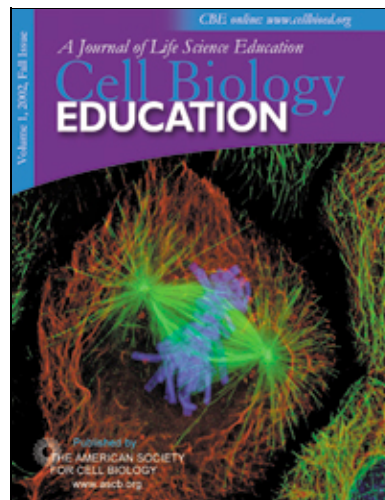

Metaphase: a newt lung cell examined by 3-D fluorescence deconvolution light microscopy. Cells in culture were stained for indirect

immunofluorescence localization of keratin filaments (red), microtubules (green), and with a fluorescent dye to reveal the chromosomes (blue). The spindle is fully formed and all of the chromosomes are bioriented (attached to opposing poles) and aligned on the equator. —*Dr. Conly L. Rieder and Dr.*

*Alexey Khodjakov, Division of Molecular  
Medicine, Wadsworth Center, New York  
State Department of Health.*

Copyright © 2001-2006 by The American Society for Cell Biology
